# Supplementary material
Source: ML conference proceedings conference paper supplement (https://openreview.net/forum?id=ClVq7fCcTs)
Supplement: supplementary_material [file attachment]

**Table 6: Performance on NUS-WIDE dataset for teacher and student models.**

| Teacher      | ResNet-101   |              |              | Swin-T       |              |              | WRN-101      |              |              |
|--------------|--------------|--------------|--------------|--------------|--------------|--------------|--------------|--------------|--------------|
| Student      | ResNet-34    |              |              | MobileNet v2 |              |              | WRN-50       |              |              |
| Metrics      | mAP          | OF1          | CF1          | mAP          | OF1          | CF1          | mAP          | OF1          | CF1          |
| Teacher      | 55.15        | 75.22        | 61.25        | 59.15        | 77.98        | 65.44        | 57.54        | 76.98        | 63.87        |
| Student      | 53.81        | 74.64        | 59.08        | 54.65        | 75.61        | 61.98        | 56.69        | 76.02        | 62.48        |
| RKD [17]     | 53.96        | 75.02        | 59.45        | 54.40        | 75.26        | 61.77        | 56.89        | 76.56        | 62.59        |
| PKT [18]     | 54.14        | 74.84        | 59.98        | 55.59        | 75.15        | 62.01        | 57.02        | 76.45        | 62.72        |
| ReviewKD [2] | 54.08        | 74.78        | 60.15        | 55.06        | 75.98        | 62.48        | 57.45        | 76.18        | 62.88        |
| MSE [25]     | 54.33        | 75.15        | 60.25        | 54.98        | 75.82        | 61.88        | 57.15        | 76.48        | 62.11        |
| PS [22]      | 54.96        | 74.69        | 59.15        | 55.32        | 75.17        | 62.82        | 56.98        | 76.89        | 63.41        |
| L2D [26]     | 55.03        | 75.33        | 59.96        | 56.38        | 76.21        | 63.04        | 57.22        | 77.33        | 63.05        |
| FitNet [1]   | 52.47        | 75.04        | 58.48        | 54.90        | 76.00        | 61.53        | 56.51        | 76.68        | 62.17        |
| <b>MDKD</b>  | <b>55.08</b> | <b>76.15</b> | <b>62.58</b> | <b>58.46</b> | <b>76.69</b> | <b>63.44</b> | <b>58.05</b> | <b>78.44</b> | <b>64.09</b> |

**Table 7: Comparison between the teacher model and the proposed MDKD on the third-order label pair dependencies, which are measured by the mean square difference and square difference, respectively (lower values indicating higher correlation). We present the scores among four labels: *parking meter* (p. m. for short), *car*, *person*, and *dog*. The input image is shown in Figure 1.**

| Label pair dependencies | Batch-level |          |       |       | Instance-level |          |       |       |
|-------------------------|-------------|----------|-------|-------|----------------|----------|-------|-------|
|                         | Teacher     | ReviewKD | L2D   | MDKD  | Teacher        | ReviewKD | L2D   | MDKD  |
| person-car-p. m.        | 0.179       | 0.251    | 0.222 | 0.187 | 0.003          | 0.007    | 0.006 | 0.004 |
| person-car-dog          | 0.211       | 0.289    | 0.327 | 0.206 | 0.005          | 0.009    | 0.020 | 0.006 |
| person-p. m.-car        | 0.432       | 0.446    | 0.425 | 0.441 | 0.005          | 0.012    | 0.012 | 0.006 |
| person-p. m.-dog        | 0.714       | 0.631    | 0.672 | 0.722 | 0.009          | 0.020    | 0.017 | 0.010 |
| person-dog-car          | 0.183       | 0.302    | 0.287 | 0.174 | 0.006          | 0.009    | 0.024 | 0.006 |
| person-dog-p. m.        | 0.432       | 0.449    | 0.429 | 0.436 | 0.007          | 0.017    | 0.015 | 0.007 |
| car-person-p. m.        | 0.431       | 0.408    | 0.507 | 0.436 | 0.005          | 0.010    | 0.009 | 0.005 |
| car-person-dog          | 0.149       | 0.225    | 0.265 | 0.151 | 0.003          | 0.007    | 0.008 | 0.002 |
| car-p. m.-Dog           | 0.462       | 0.475    | 0.387 | 0.472 | 0.007          | 0.017    | 0.013 | 0.009 |
| car-dog-p. m.           | 0.494       | 0.513    | 0.492 | 0.491 | 0.009          | 0.018    | 0.027 | 0.011 |
| p. m.-person-dog        | 0.403       | 0.420    | 0.468 | 0.404 | 0.005          | 0.011    | 0.013 | 0.005 |
| p. m.-car-dog           | 0.212       | 0.328    | 0.244 | 0.210 | 0.006          | 0.010    | 0.022 | 0.007 |

**Table 8: Comparison between the teacher model and the proposed MDKD on the fourth-order label pair dependencies, which are measured by the mean square difference and square difference, respectively (lower values indicating higher correlation). We present the scores among four labels: *parking meter* (p. m. for short), *car*, *person*, and *dog*. The input image is shown in Figure 1.**

| Label pair dependencies | Batch-level |          |       |       | Instance-level |          |       |       |
|-------------------------|-------------|----------|-------|-------|----------------|----------|-------|-------|
|                         | Teacher     | ReviewKD | L2D   | MDKD  | Teacher        | ReviewKD | L2D   | MDKD  |
| person-car-p. m.-dog    | 0.367       | 0.387    | 0.359 | 0.376 | 0.005          | 0.013    | 0.010 | 0.007 |
| person-car-dog-p.m.     | 0.389       | 0.413    | 0.429 | 0.388 | 0.007          | 0.014    | 0.019 | 0.008 |
| person-p. m.-car-dog    | 0.370       | 0.419    | 0.400 | 0.370 | 0.007          | 0.012    | 0.020 | 0.007 |
| person-p. m.-dog-car    | 0.557       | 0.543    | 0.565 | 0.557 | 0.009          | 0.017    | 0.023 | 0.010 |
| person-dog-car-p. m.    | 0.182       | 0.298    | 0.238 | 0.180 | 0.005          | 0.009    | 0.019 | 0.006 |
| person-dog-p. m.-car    | 0.348       | 0.396    | 0.333 | 0.354 | 0.005          | 0.014    | 0.013 | 0.007 |
| car-person-p. m.-dog    | 0.535       | 0.492    | 0.550 | 0.542 | 0.007          | 0.015    | 0.012 | 0.007 |
| car-person-dog-p. m.    | 0.347       | 0.370    | 0.388 | 0.352 | 0.005          | 0.013    | 0.011 | 0.006 |
| car-p. m.-person-dog    | 0.328       | 0.377    | 0.358 | 0.333 | 0.005          | 0.011    | 0.012 | 0.005 |
| car-dog-person-p. m.    | 0.350       | 0.402    | 0.429 | 0.346 | 0.007          | 0.011    | 0.021 | 0.006 |
| p. m.-person-car-dog    | 0.369       | 0.394    | 0.455 | 0.367 | 0.006          | 0.011    | 0.018 | 0.006 |
| p. m.-car-person-dog    | 0.160       | 0.247    | 0.223 | 0.164 | 0.003          | 0.008    | 0.008 | 0.003 |

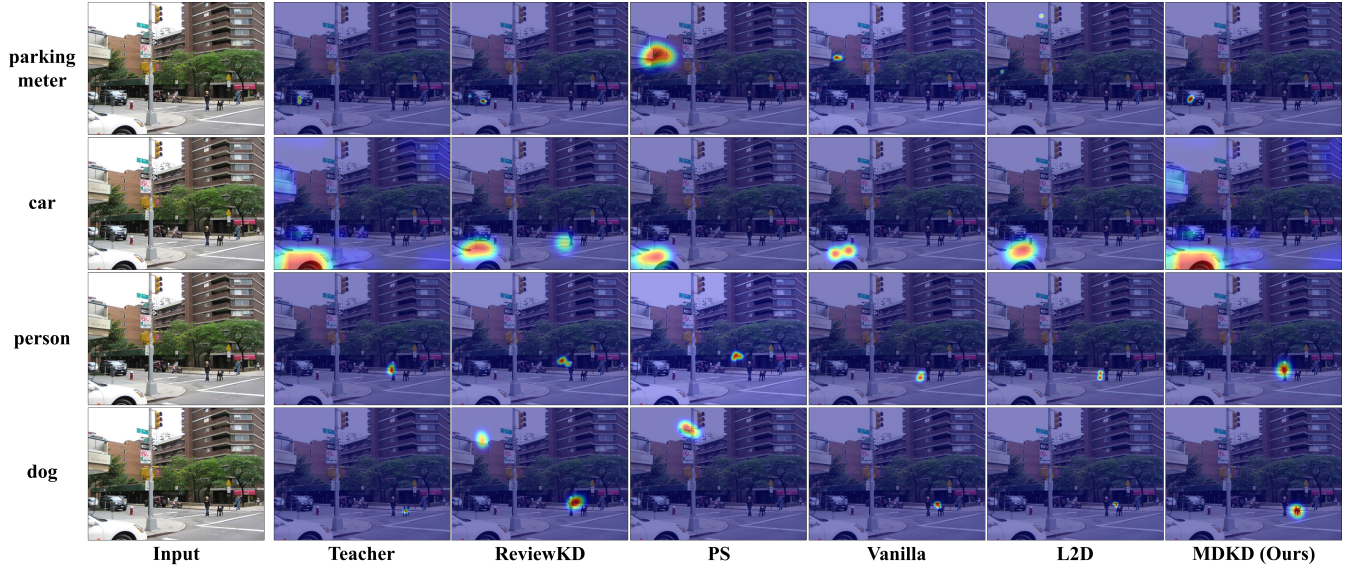Figure 7: Attention maps for *parking meter*, *car*, *person*, and *dog* by different methods.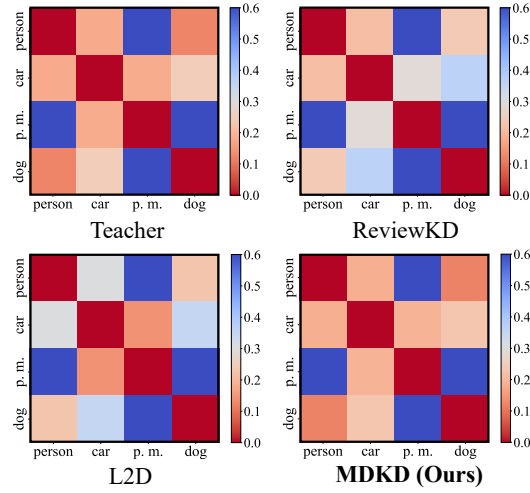Figure 8: The batch-level second-order label pair dependencies of different methods, measured by mean square difference (lower values indicating higher correlation). The scores among four labels: *parking meter* (p. m. for short), *car*, *person*, and *dog* are presented. The input image is shown in Figure 1.
